# Supplementary material for: Lipid Indexes and Quality Evaluation of Omega-3 Rich Oil from the Waste of Japanese Spanish Mackerel Extracted by Supercritical CO2
Source: MDPI journal article supplement (doi:10.3390/md20010070), 2022-01-13
Supplement: s1 [file s1]

# Lipid Indexes and Quality Evaluation of Omega-3 Rich Oil from the Waste of Japanese Spanish Mackerel Extracted by Supercritical CO<sub>2</sub>

## Supplementary File

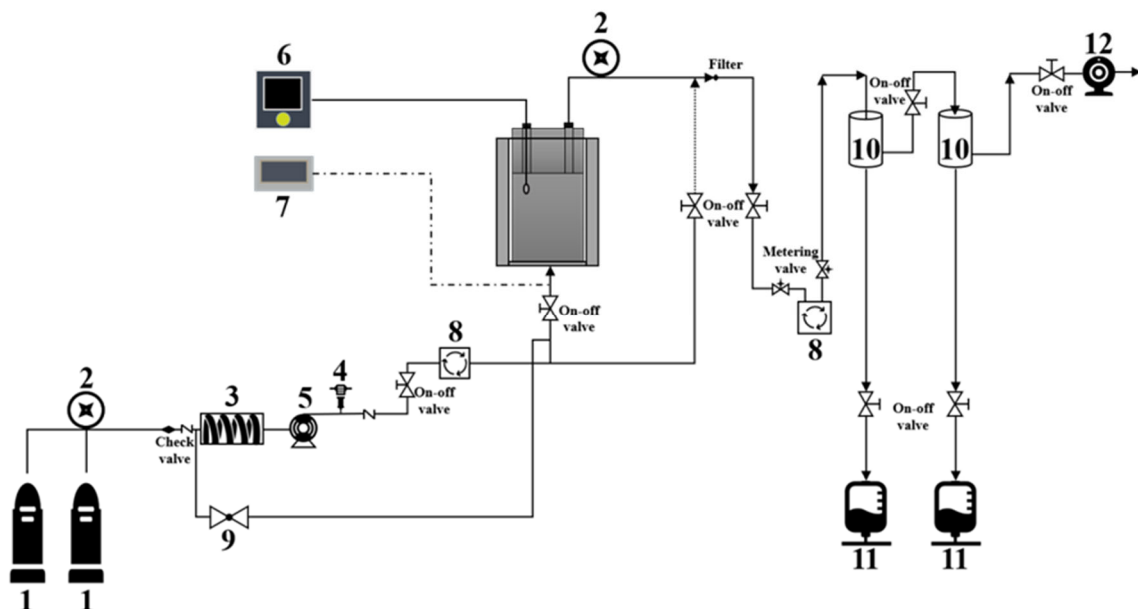

**Figure S1.** A schematic diagram of SC-CO<sub>2</sub> extraction process.

(1: CO<sub>2</sub> tank, 2: Pressure gauge, 3: Cooling bath, 4: Safety valve, 5: Main pump, 6: Electric indicator, 7: Pressure indicator, 8: Heat exchanger, 9: BPR valve, 10: Separator, 11: Sample collector, 12: Gas flow meter)

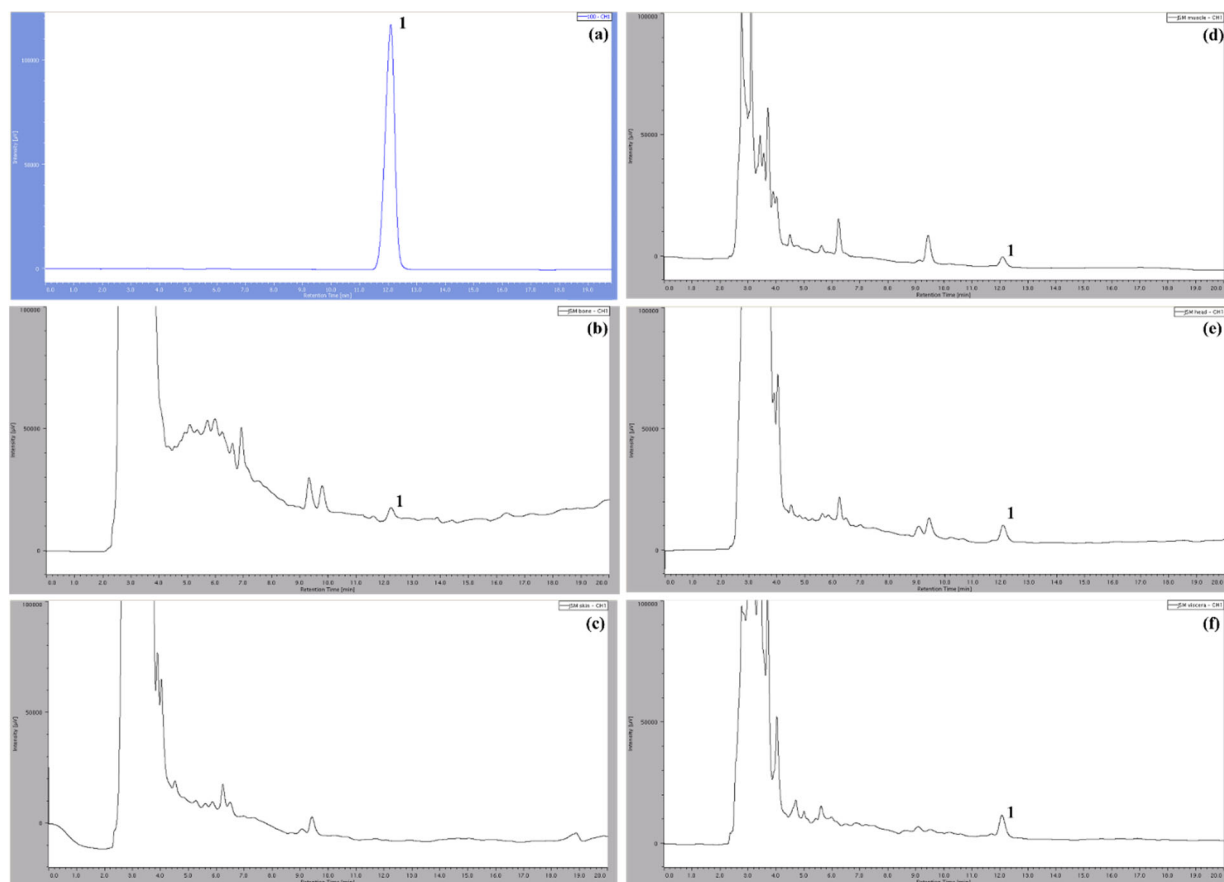

**Figure S2.** HPLC chromatograms of vitamin D (1) of standards and samples (vitamin D standard (a), bone oil (b), skin oil (c), muscle oil (d), head oil (e), and viscera oil (f))

**Table S1.** Proximate compositions of JSM raw materials

|                 | Skin                      | Muscle                    | Bone                      | Head                      | Belly                     | Others                   |
|-----------------|---------------------------|---------------------------|---------------------------|---------------------------|---------------------------|--------------------------|
| Body percentage | 8.61 ± 0.34 <sup>d</sup>  | 50.89 ± 0.30 <sup>a</sup> | 7.91 ± 0.14 <sup>e</sup>  | 16.03 ± 0.17 <sup>b</sup> | 6.22 ± 0.22 <sup>f</sup>  | 9.96 ± 0.13 <sup>c</sup> |
| Moisture        | 2.28 ± 0.17 <sup>d</sup>  | 11.96 ± 0.51 <sup>a</sup> | 2.42 ± 0.41 <sup>d</sup>  | 3.87 ± 0.25 <sup>c</sup>  | 11.09 ± 0.73 <sup>b</sup> | -                        |
| Lipid           | 51.08 ± 0.01 <sup>a</sup> | 30.24 ± 0.47 <sup>c</sup> | 42.50 ± 1.03 <sup>b</sup> | 42.27 ± 0.96 <sup>b</sup> | 30.27 ± 1.08 <sup>c</sup> | -                        |
| Ash             | 4.78 ± 0.06 <sup>d</sup>  | 6.87 ± 0.37 <sup>c</sup>  | 9.19 ± 0.59 <sup>a</sup>  | 9.09 ± 0.49 <sup>b</sup>  | 4.43 ± 0.74 <sup>d</sup>  | -                        |
| Protein         | 40.12 ± 0.27 <sup>e</sup> | 49.14 ± 0.44 <sup>b</sup> | 45.52 ± 0.34 <sup>c</sup> | 44.39 ± 0.40 <sup>d</sup> | 52.17 ± 0.36 <sup>a</sup> | -                        |

±, indicates the standard deviation from the mean; different superscripts indicate the significant differences ( $P < 0.05$ )

**Table S2.** Gas chromatography operating conditions for fatty acid analysis of anchovy oils and commercial oils

| Parameters              | Conditions                                                                                            |
|-------------------------|-------------------------------------------------------------------------------------------------------|
| Instrument              | Agilent 6890N GC System                                                                               |
| Split                   | Splitless                                                                                             |
| Inject Temperature      | 250 °C                                                                                                |
| Carrier Gas & Flow Rate | He, 0.5 mL/min                                                                                        |
| Oven Condition          | 140 °C (5 min) → 4 °C/min for 25 min → 240°C (17 min)                                                 |
| Detect Temperature      | 260 °C                                                                                                |
| Column                  | Supelco sp. 2560, capillary column<br>Fused silica Capillary 100.0 m × 250 µm × 0.2 µm film thickness |
